# Supplementary material for: Enhancement of immune response against Bordetella spp. by disrupting immunomodulation
Source: PubMed Central journal article supplement (PMC6937331; doi:10.1038/s41598-019-56652-z), 2019-12-30
Supplement: 41598_2019_56652_MOESM1_ESM.pdf [file 41598_2019_56652_MOESM1_ESM.pdf]

**Title: Enhancement of immune response against *Bordetella* spp. by disrupting immunomodulation**

Monica C. Gestal<sup>1\*</sup>, Laura K. Howard<sup>1</sup>, Kalyan Dewan<sup>1</sup>, Hannah M. Johnson<sup>1</sup>, Mariette Barbier<sup>2,3</sup>, Clare Bryant<sup>4</sup>, Illiassou Hamidou Soumana<sup>1</sup>, Israel Rivera<sup>1</sup>, Bodo Linz<sup>1</sup>, Uriel Blas-Machado<sup>5</sup>, and Eric T. Harvill<sup>1\*</sup>.

<sup>1</sup>Department of Infectious Diseases, College of Veterinary Medicine, University of Georgia, Athens, Georgia, United States of America.

<sup>2</sup>Department of Microbiology, Immunology, and Cell Biology, West Virginia University, 9 Morgantown, WV, United States of America.

<sup>3</sup>Vaccine Development Center at West Virginia University Health Sciences Center, Morgantown, West Virginia, USA.

<sup>4</sup>Department of Veterinary Medicine, University of Cambridge, Cambridge CB3 0ES, United Kingdom.

<sup>5</sup>Department of Pathology, Athens Veterinary Diagnostic Laboratory, University of Georgia, Athens, Georgia, United States of America.

**Corresponding authors:**

Monica Cartelle Gestal: [mcarges@gmail.com](mailto:mcarges@gmail.com) // [mcgestal@uga.edu](mailto:mcgestal@uga.edu)

Eric T. Harvill: [Harvill@uga.edu](mailto:Harvill@uga.edu)

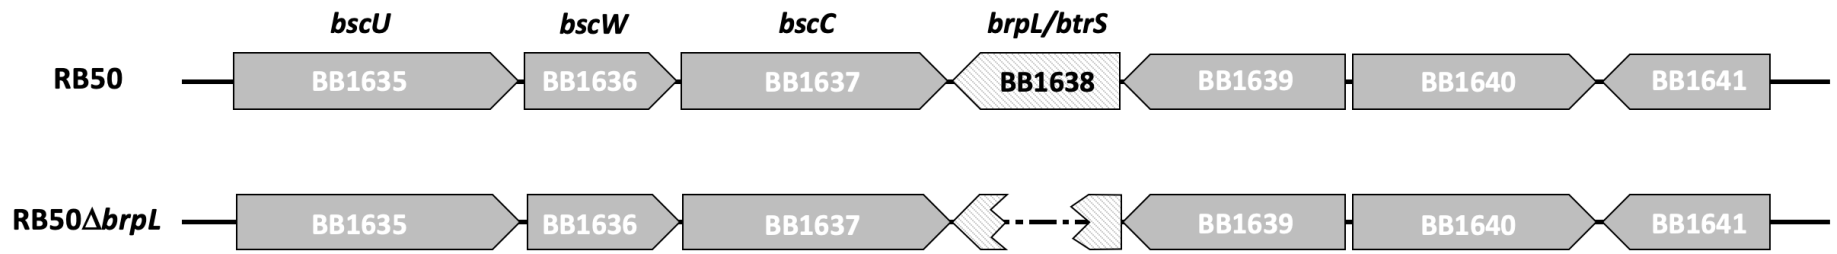

**Figure S1: Genetic context for RB50 $\Delta$ *btrS* mutant strain.** Diagram showing the clean, in-frame deletion of the *brpL/btrS* gene (Locs\_tag BB1638) in the RB50 *B. bronchiseptica* chromosome.

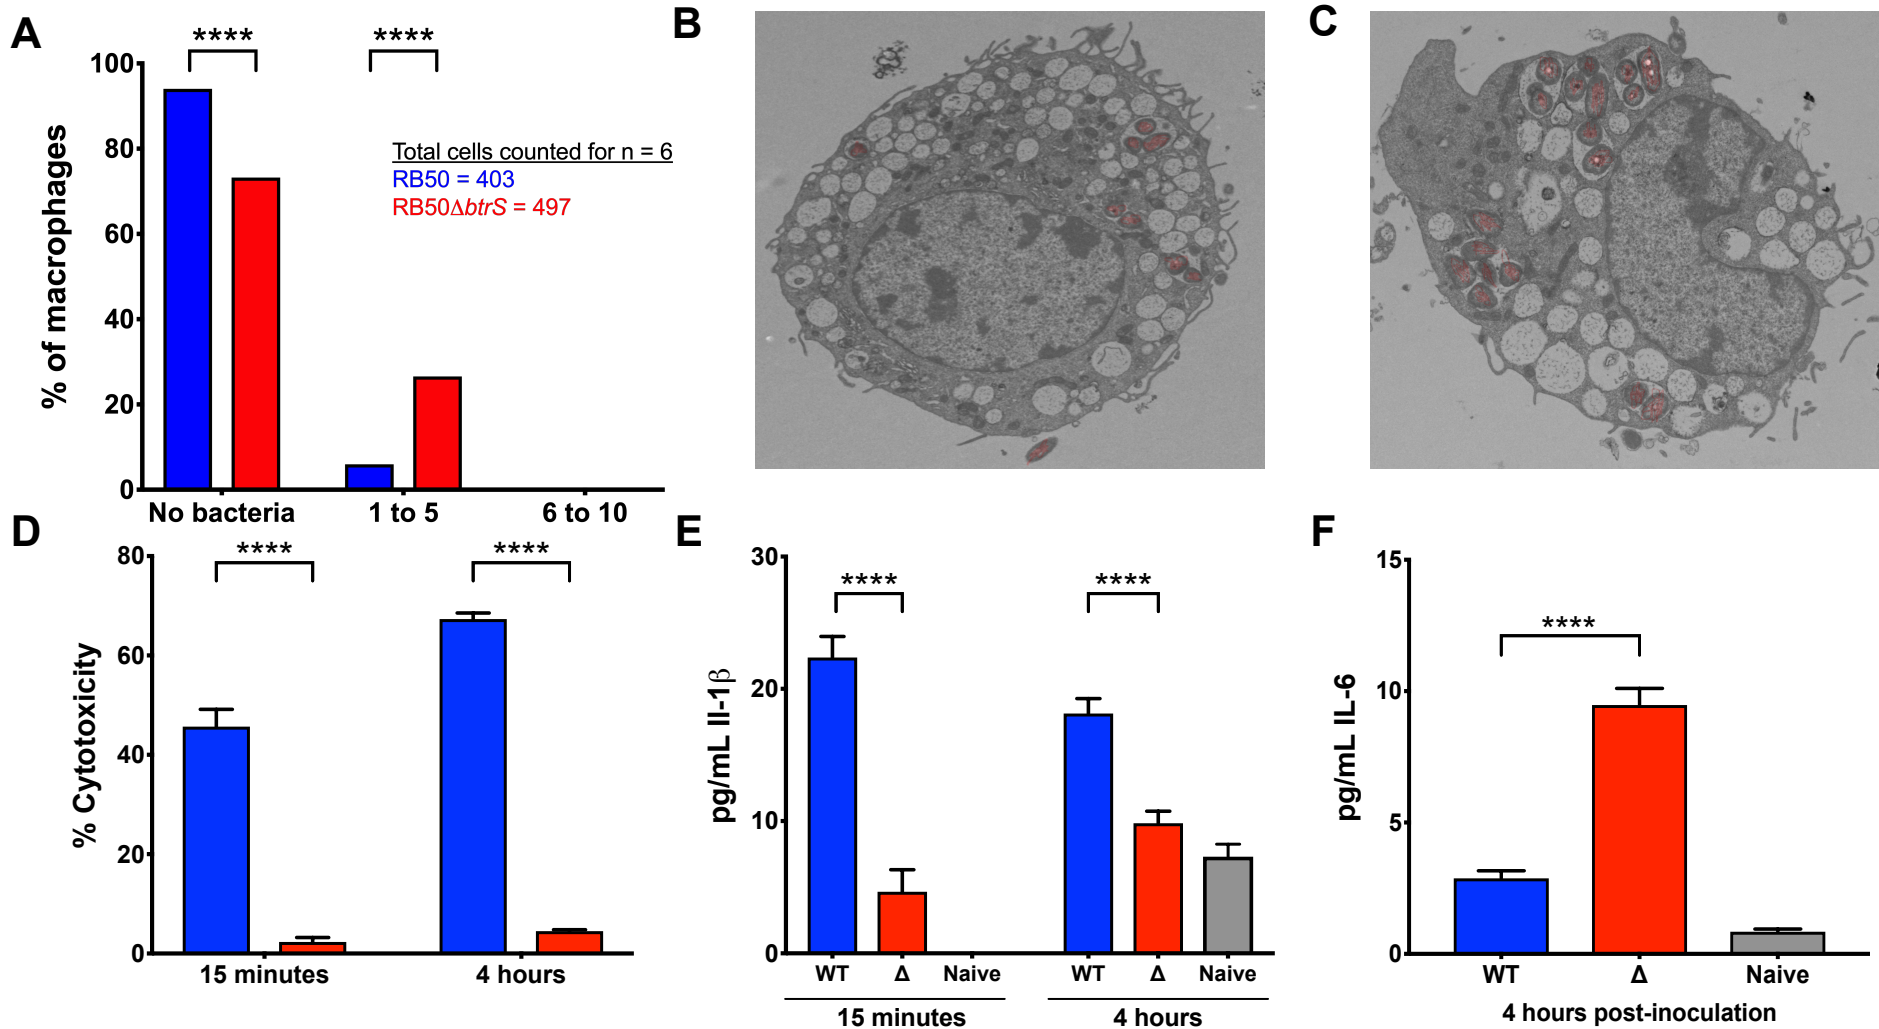

**Figure S2:** Macrophages at a confluency of 97-99% were challenged at an MOI of 100, n=6. **(A)** Percentage of macrophages containing the indicated number of bacteria at 15 minutes post-exposure. RB50 (blue) and RB50 $\Delta$ btrS (red) were enumerated using Transmission Electron Microscopy (TEM). TEM of RAW macrophages challenged for 4 hours with RB50 **(B)** (bacteria are shown in red) or with the mutant **(C)**. **(D)** Cytotoxicity of RB50 and RB50 $\Delta$ btrS at 15 min and 4 hours post-challenge. **(E)** IL-1 $\beta$  secreted measured at 15 min and 4 hours post-challenged of macrophages challenged with wild-type or mutant *B. bronchiseptica*. **(F)** IL-6 secreted at 4 hours post-challenge with RB50 or RB50 $\Delta$ btrS. Statistical significance was calculated using Two-Way ANOVA. \* p<0.05, \*\* p<0.005, \*\*\* p<0.0005, and \*\*\*\* p<0.0001. Error bars indicate SEM.

## 28 days post infection

**A**

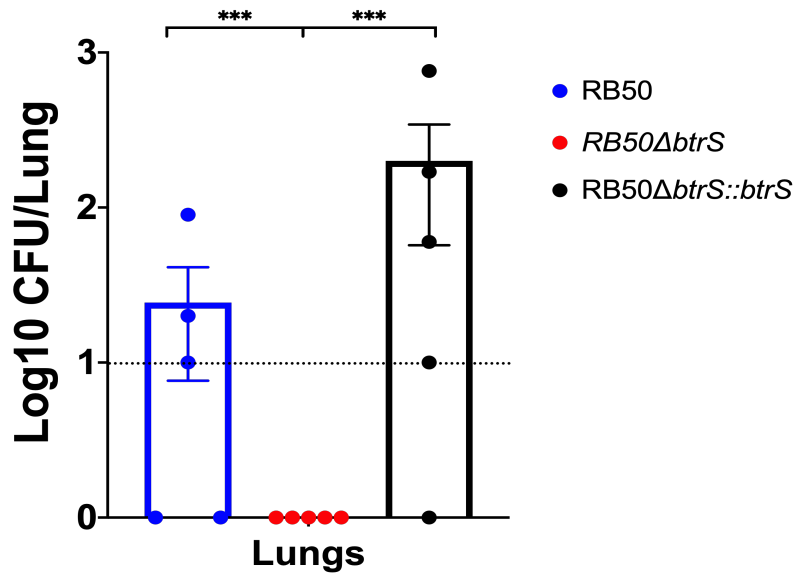

**B**

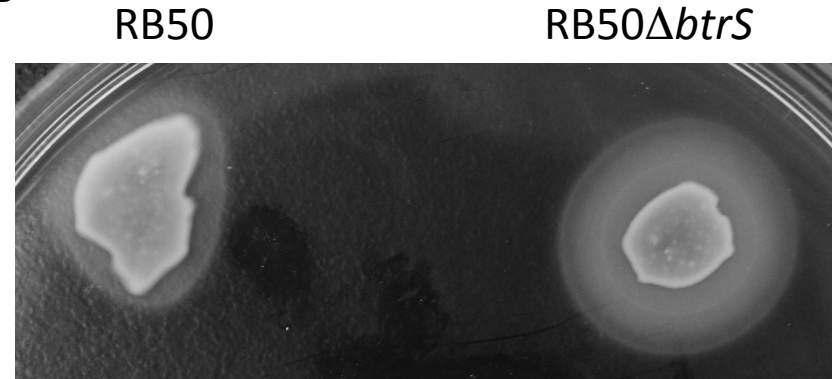

**C**

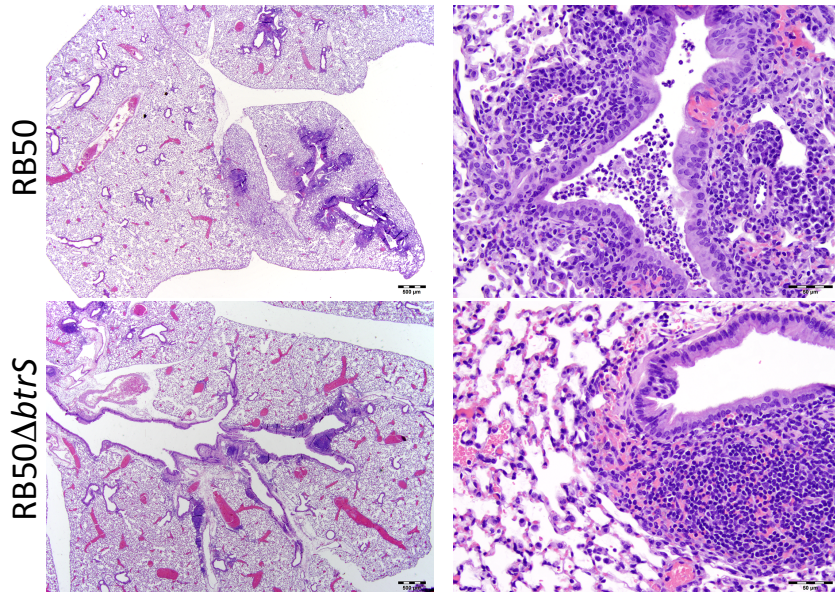

**Figure S3: Phenotypes that required *btrS* *in vivo* and *in vitro*.** (A) Mice were intranasally challenged with RB50 (blue), *RB50ΔbtrS* (red), or *RB50ΔbtrS::btrS* (black). 28 days post-inoculation organs were harvest and bacterial load in the lungs was enumerated. (B) Motility assay was performed in 0.4% LB agar inoculated with 10 $\mu$ l of a liquid culture of RB50 or *RB50ΔbtrS* at an OD of 0.7. The plates were read at 24 and 48 hours post-inoculation (n=4) (B) Mice were intranasally challenged with RB50 or *RB50ΔbtrS* and pathological studies (H&E) were performed. In the left is the zoom out and the right is the zoom in image of RB50 (top) and *RB50ΔbtrS* (bottom).



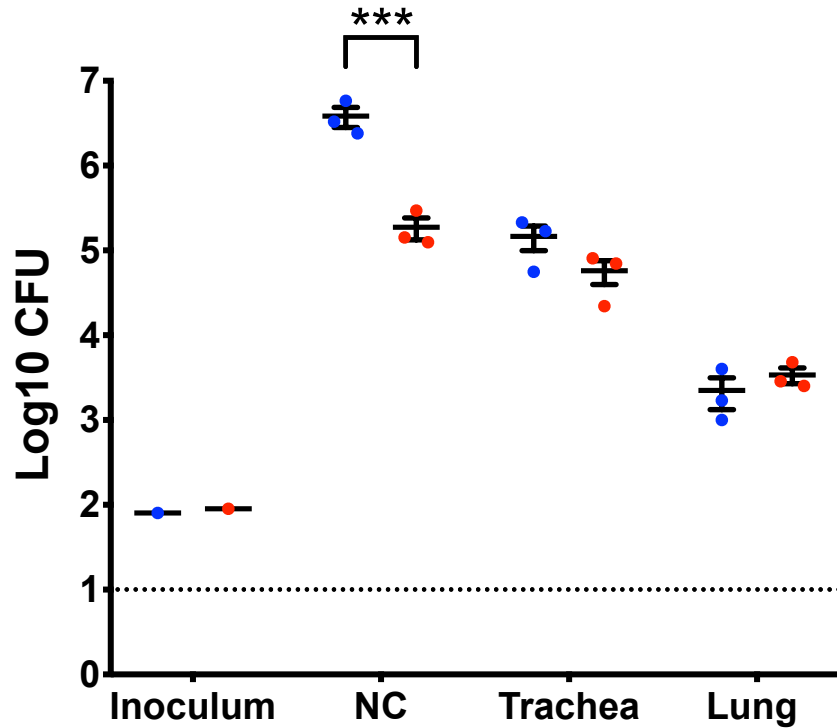

**Figure S4: Bacterial numbers isolated from nasal cavity, trachea, and lungs of *Rag*<sup>-/-</sup> mice.** Groups of 4 mice were challenged with a low dose (150 CFU) in a low volume (5mL) of wild-type (blue) or mutant (red) *B. bronchiseptica* at 24 days post-inoculation. Bacterial load from the respiratory tract organs was enumerated (n=2). Statistical significance was calculated using Two-Way ANOVA. \*\*\* p<0.0005. Error bars indicate SEM.

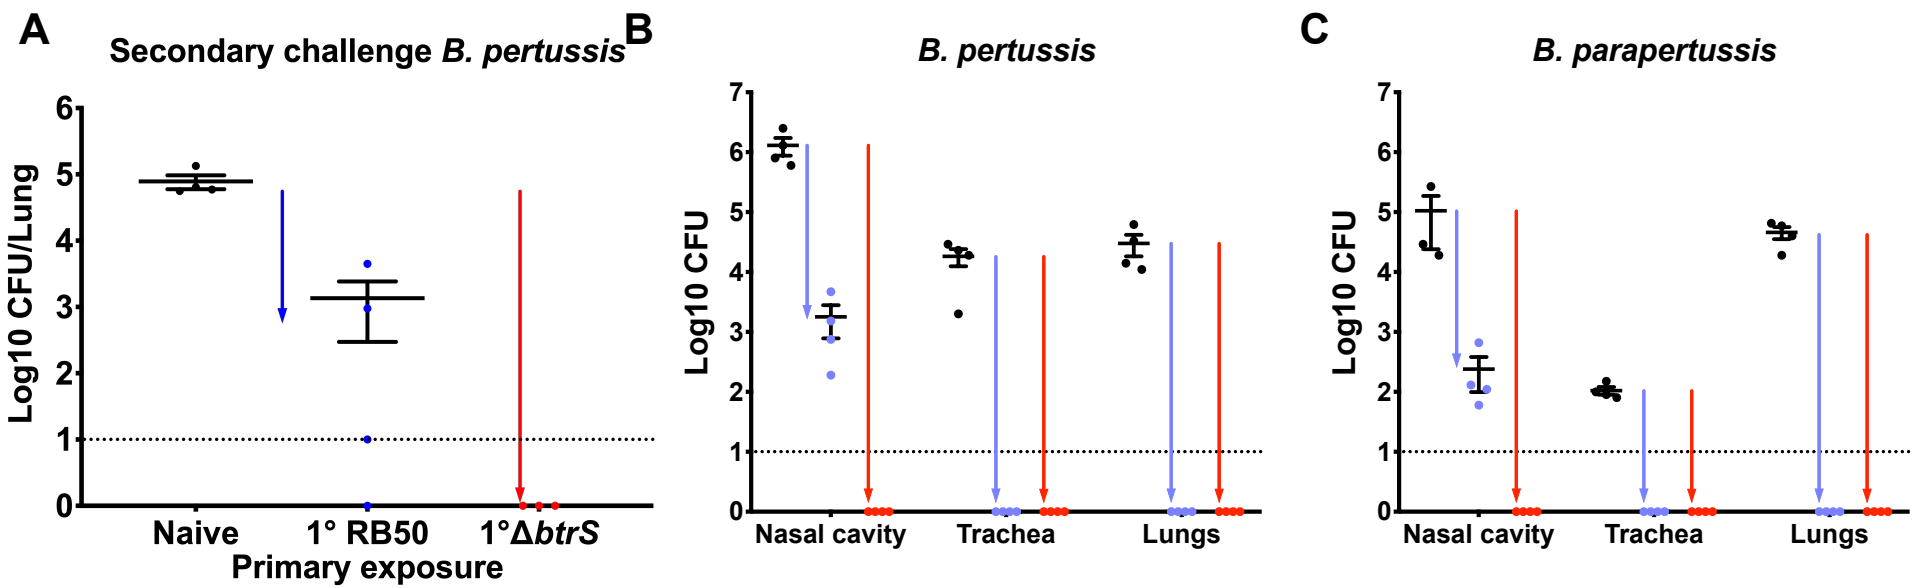

**Figure S5: Efficiency of RB50 $\Delta btrS$  as a vaccine against *B. pertussis* and *B. parapertussis*.** (A) Mice were challenged with PBS (black), RB50 (blue), or RB50 $\Delta btrS$  (red). 3 months post-exposure, mice were inoculated with *B. pertussis* and sacrificed at day 7 (n=4). Bacterial load in the lungs was enumerated. (B-C) Mice were vaccinated with PBS (black), Adacel acellular vaccine (violet), or RB50 $\Delta btrS$  (red). 60 days later, mice were re-challenged with (B) *B. pertussis* or (C) *B. parapertussis* and euthanized at day 7 (n=4).

# RB50 / RB50 $\Delta$ btrS

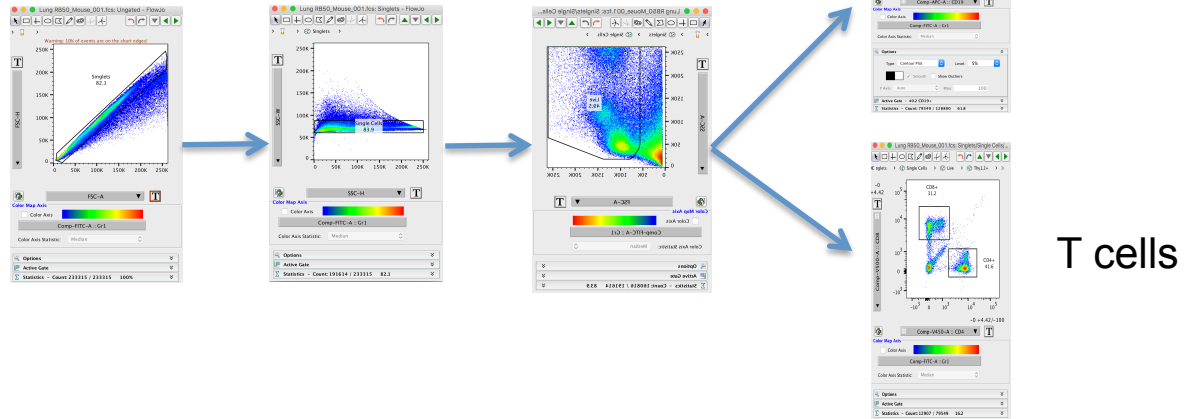

**Figure S6: Gating strategy utilized for flow cytometry.** Strategies adapted from standard gating procedures (52) (n=6 per experiment of 4).

**Table S1.**

Antibodies used in this study are detailed on the table below.

| Laser     | BP filter | Fluorochromes | Cytokine | Vendor | Reference |
|-----------|-----------|---------------|----------|--------|-----------|
| 488 Laser |           |               |          |        |           |
| B         | 525/50    | FitC          | GR1      | Tonbo  | 35-5931   |
| 532 Laser |           |               |          |        |           |
| E         | 575/20    | PE            | CD11b    | Tonbo  | 50-0112   |
| 488 Laser |           |               |          |        |           |
| A         | 695/40    | PerCP         | F4/80    | Tonbo  | 65-4801   |
| 640 Laser |           |               |          |        |           |
| C         | 660/20    | APC           | CD19     | Tonbo  | 20-0193   |
| 640 Laser |           |               |          |        |           |
| A         | 780/60    | APC-Cy7       | CD90.2   | BD     | 561641    |
| 405 Laser |           |               |          |        |           |
| C         | 450/50    | V450          | CD4      | Tonbo  | 75-0041   |
| 404 Laser |           |               |          |        |           |
| B         | 525/50    | V500          | CD8      | BD     | 563068    |
